# Supplementary material for: Mitotic activity shapes stage-specific histone modification profiles during Xenopus embryogenesis
Source: bioRxiv preprint, doi:10.1101/2020.08.04.200550, version 1 (2020-08-04)
Supplement: Table S4 [file 200550_file20.xlsx]

## Sheet: Sheet1
	5' - 3' sequence
gene	forward	reverse
pax6	ACCCCAGAAGTGGTGAACAA	GACTCCCTCAGACAGCAACC
actc1	ATCTGCCGGTATCCATGAAA	CCACCAGAGAGGACGTTGTT
twist1	AATGTCAGGGAGCGTCAGAG	CCAGTTTGAGCGTTTGGATT
myt1	TCCCCTGACCAATCTCAAAG	GGACCATCCCAATCATCTTG
tnni3	ACTGTCCGGCTTATCCCTCT	GTTCACTTCGGCTTCCATGT
fabp2	TGAAAGAATCCAGCACATTCC	GAACCAGGCACCATTGAGTT
odc	ACAAAGAAACCCAAACCAGA	CAAACAACATCCAGTCTCCAA
